# Supplementary material for: Preparation of reduced graphene oxide coated flaky carbonyl iron composites and their excellent microwave absorption properties
Source: Royal Society of Chemistry journal article supplement (doi:10.1039/c7ra12984j), 2018-01-01
Supplement: c7ra12984j1.pdf [file c7ra12984j1.pdf]

**Supplementary information for:**

**Preparation of reduced graphene oxide coated flaky carbonyl iron  
composites and their excellent microwave absorption properties**

Lihua He<sup>a,b</sup>, Yan Zhao<sup>a,\*</sup>, Liying Xing<sup>b</sup>, Pinggui Liu<sup>b</sup>, Zhiyong Wang<sup>b</sup>, Youwei Zhang<sup>b</sup>, Ying Wang<sup>c</sup>, Yunchen Du<sup>c</sup>

<sup>a</sup> School of Materials Science and Engineering, Beihang University, Beijing 100191, China.

<sup>b</sup> Beijing Institute of Aeronautical Materials, Beijing 100095, China.

<sup>c</sup> MIIT Key Laboratory of Critical Materials Technology for New Energy Conversion and Storage,  
School of Chemistry and Chemical Engineering, Harbin Institute of Technology, Harbin 150001,  
China

*Corresponding author: Yan Zhao. Tel/Fax: +86-010-82317127.*

*E-mail address: Helihua-xjt@163.com; [jennyzhaoyan@buaa.edu.cn](mailto:jennyzhaoyan@buaa.edu.cn)*

---

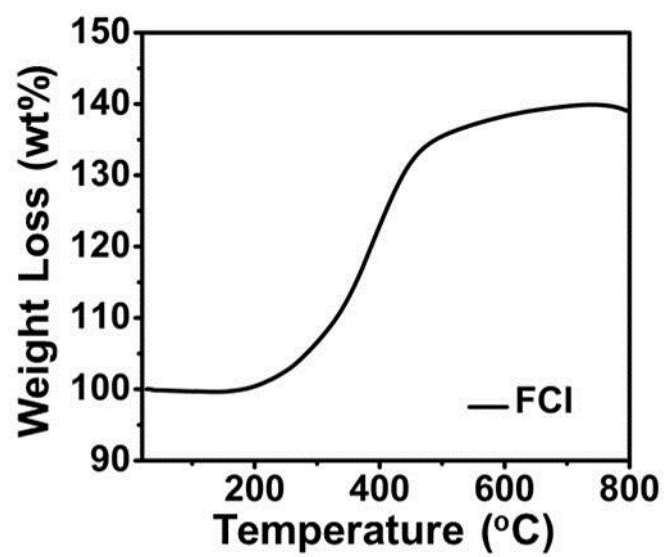

Fig. S1. TG curves of FCI.

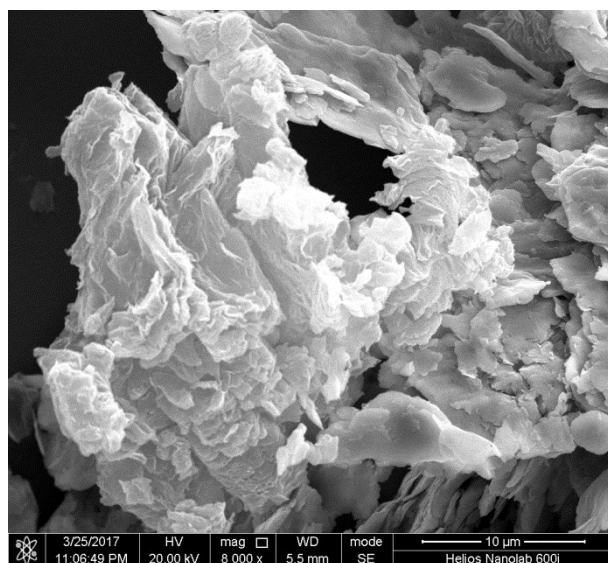

**Fig. S2.** SEM image of control composite of rGO/FCl.

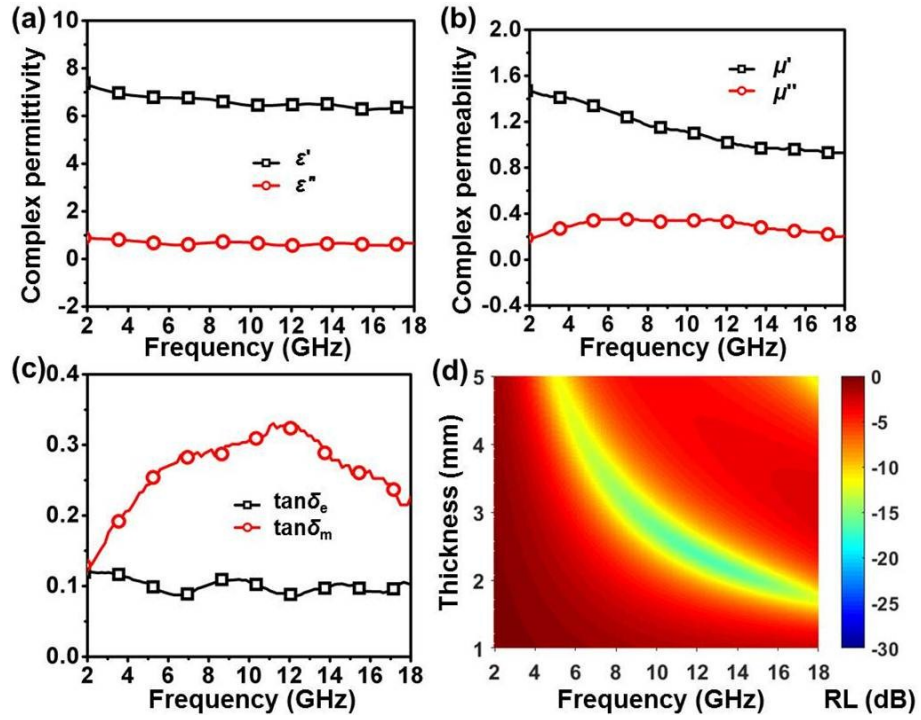

**Fig. S3.** Complex permittivity (a), complex permeability (b), dielectric loss tangent and magnetic loss tangent (c) and reflection loss of rGO/FCI composite in the frequency range of 2.0-18.0 GHz.

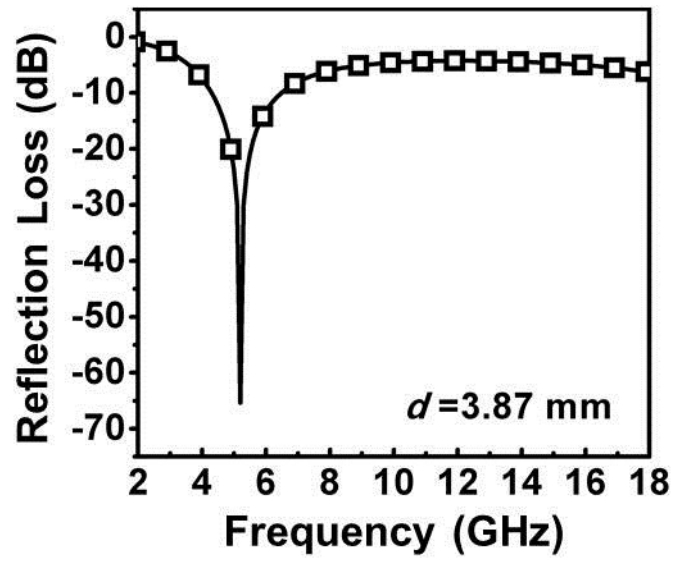

**Fig. S4.** Reflection loss of rGO-coated FCI composite in the frequency range of 2.0-18.0 GHz with an absorber thickness of 3.87 mm.
